# Supplementary material
Source: PubMed Central journal article supplement (PMC2866015)
Supplement: NIHMS194330-supplement-1_si_001.pdf [file NIHMS194330-supplement-1_si_001.pdf]

| Spot | Protein name                       | Accession number | Total peptides | Sequence coverage | Peptide sequence       | Spectrum charge |
|------|------------------------------------|------------------|----------------|-------------------|------------------------|-----------------|
| 1    | Myosin light polypeptide 3         | gi 33563264      | 11             | 0.544             | EAEFDASK               | 1, 2            |
| 1    |                                    |                  |                | 0.544             | LTEDEVEK               | 2               |
| 1    |                                    |                  |                | 0.544             | HVLATLGER              | 2               |
| 1    |                                    |                  |                | 0.544             | EAFLLFDR               | 2               |
| 1    |                                    |                  |                | 0.544             | NKDTGTYEDFVEGLR        | 3               |
| 1    |                                    |                  |                | 0.544             | EGNGTVMGAELR           | 2               |
| 1    |                                    |                  |                | 0.544             | EGNGTVMGAELR           | 2               |
| 1    |                                    |                  |                | 0.544             | ITYGQcGDVLR            | 2               |
| 1    |                                    |                  |                | 0.544             | AAPAPAAAPAAAPAAPEPERPK | 3               |
| 1    |                                    |                  |                | 0.544             | ALGQNPTQAEVLR          | 2               |
| 1    |                                    |                  |                | 0.544             | DTGTYEDFVEGLR          | 2               |
| 1    |                                    |                  |                | 0.544             | VFDKEGNGTVMGAELR       | 2               |
| 1    | EF hand domain containing 2        | gi 31981086      | 6              | 0.317             | VFNPYTEFK              | 2               |
| 1    |                                    |                  |                | 0.317             | AAAGELQEDSGLHVLAR      | 3               |
| 1    |                                    |                  |                | 0.317             | DGFIDLmELK             | 2               |
| 1    |                                    |                  |                | 0.317             | LSEIDVSTEGVK           | 2               |
| 1    |                                    |                  |                | 0.317             | SmIQEVEDDFDSK          | 2               |
| 1    |                                    |                  |                | 0.317             | ADLNQIGIGEPQSPSR       | 2               |
| 1    | Heat shock protein 20-like protein | gi 13507646      | 5              | 0.199             | RDPFR                  | 2               |
| 1    |                                    |                  |                | 0.199             | DSPLSSR                | 2               |
| 1    |                                    |                  |                | 0.199             | FGVPAEGR               | 2               |
| 1    |                                    |                  |                | 0.199             | DGYVEVSGK              | 2               |
| 1    |                                    |                  |                | 0.199             | LSSAWPGTLR             | 2               |
| 1    | Tpd52 protein [Mus musculus]       | gi 13278549      | 3              | 0.189             | LGISLQEFK              | 2               |
| 1    |                                    |                  |                | 0.189             | TSETLSQAGQK            | 2               |
| 1    |                                    |                  |                | 0.189             | ASAAFSSVGSVITK         | 2               |
| 1    | Apolipoprotein A-1                 | gi 74203337      | 5              | 0.189             | ARPAEDLR               | 3               |
| 1    |                                    |                  |                | 0.189             | LQELQGR                | 2               |
| 1    |                                    |                  |                | 0.189             | DFANVYVDAVK            | 2               |
| 1    |                                    |                  |                | 0.189             | VQPYLDEFQK             | 2               |
| 1    |                                    |                  |                | 0.189             | VAPLGAELQESAR          | 2               |
| 1    | Peroxiredoxin-2                    | gi 56541226      | 3              | 0.182             | SVDEALR                | 2               |
| 1    |                                    |                  |                | 0.182             | NDEGIAYR               | 2               |
| 1    |                                    |                  |                | 0.182             | SLSQNYGVLK             | 2               |
| 1    |                                    |                  |                | 0.182             | QITVNDLPVGR            | 2               |
| 1    | Cytochrome oxidase subunit II      | gi 829023        | 4              | 0.150             | TDAIPGR                | 2               |
| 1    |                                    |                  |                | 0.150             | LLEVDNR                | 2               |
| 1    |                                    |                  |                | 0.150             | LNQATVTSNR             | 2               |
| 1    |                                    |                  |                | 0.150             | VVLPmELPIR             | 2               |
| 1    | Lactoylglutathione lyase           | gi 21362640      | 3              | 0.147             | RFEELGVK               | 2               |
| 1    |                                    |                  |                | 0.147             | VLGLTLLQK              | 2               |
| 1    |                                    |                  |                | 0.147             | DFLLQQTmLR             | 2               |

Supplementary Table 1.xls

|   |                                                  |              |    |       |                  |      |
|---|--------------------------------------------------|--------------|----|-------|------------------|------|
| 1 | Phosphatidylethanolamine binding protein         | gi 1517864   | 2  | 0.112 | LYEQLSGK         | 2    |
| 1 |                                                  |              |    | 0.112 | VDYAGVTVDELGK    | 2    |
| 1 | Heterochromatin protein 1 beta                   | gi 48249223  | 2  | 0.103 | GKVEYLLK         | 2    |
| 1 |                                                  |              |    | 0.103 | NSDEADLVPAK      | 2    |
| 1 | Myeloid bactenecin                               | gi 2071985   | 2  | 0.096 | YEEIVDR          | 2    |
| 1 |                                                  |              |    | 0.096 | AIEAYNQGR        | 2    |
| 1 | Desmin                                           | gi 33563250  | 3  | 0.064 | ADVDAATLAR       | 2    |
| 1 |                                                  |              |    | 0.064 | QVEVLTNQR        | 2    |
| 1 |                                                  |              |    | 0.064 | EEAENNLAAFR      | 2    |
| 1 | Apolipoprotein J                                 | gi 2119394   | 2  | 0.054 | IDSLLSDR         | 2    |
| 1 |                                                  |              |    | 0.054 | QQSQVLDAmQDSFAR  | 2, 3 |
| 1 | PREDICTED: similar to ATP synthase beta chain    | gi 73968432  | 2  | 0.049 | IPVGPETLGR       | 2    |
| 1 |                                                  |              |    | 0.049 | ImDPNIVGNEHYDVAR | 3    |
| 1 | PREDICTED: similar to Actin, cytoplasmic 2 (gamr | gi 109489498 | 2  | 0.020 | LDLAGR           | 2    |
| 1 |                                                  |              |    | 0.020 | DLTDYLmK         | 2    |
| 2 | Myosin light chain 2                             | gi 1709058   | 11 | 0.500 | DGFIDK           | 2    |
| 2 |                                                  |              |    | 0.500 | VFDPEGK          | 2    |
| 2 |                                                  |              |    | 0.500 | VNVKNEEIDEmIK    | 2, 3 |
| 2 |                                                  |              |    | 0.500 | EMLTTQAER        | 2    |
| 2 |                                                  |              |    | 0.500 | EmLTTQAER        | 2    |
| 2 |                                                  |              |    | 0.500 | NEEIDEMIK        | 2    |
| 2 |                                                  |              |    | 0.500 | NEEIDEmIK        | 2    |
| 2 |                                                  |              |    | 0.500 | DGFIDKNDLR       | 2    |
| 2 |                                                  |              |    | 0.500 | EAFTIMDQNR       | 2    |
| 2 |                                                  |              |    | 0.500 | EAFTImDQNR       | 2    |
| 2 |                                                  |              |    | 0.500 | NLVHIITHGEEK     | 2    |
| 2 |                                                  |              |    | 0.500 | GADPEETILNAFK    | 2    |
| 2 |                                                  |              |    | 0.500 | NLVHIITHGEEKD    | 2    |
| 2 |                                                  |              |    | 0.500 | DTFAALGR         | 1    |
| 2 | Myosin light chain,regulatory B-like             | gi 71037403  | 5  | 0.331 | ELLTTmGDR        | 2    |
| 2 |                                                  |              |    | 0.331 | LNGTDPEDVIR      | 2    |
| 2 |                                                  |              |    | 0.331 | EAFNmIDQNR       | 2    |
| 2 |                                                  |              |    | 0.331 | GNFNIEFTR        | 2    |
| 2 |                                                  |              |    | 0.331 | FTDEEVDELYR      | 2    |
| 2 | Cytochrome b5 type B                             | gi 31542438  | 2  | 0.185 | QYYIGDVHPSDLKPK  | 3    |
| 2 |                                                  |              |    | 0.185 | VEGSEPSVTYYR     | 2    |
| 2 | Myosin light polypeptide 3                       | gi 33563264  | 3  | 0.147 | LTEDEVEK         | 2    |
| 2 |                                                  |              |    | 0.147 | HVLATLGER        | 2    |
| 2 |                                                  |              |    | 0.147 | ALGQNPTQAEVLR    | 2    |
| 2 | PREDICTED: similar to Actin, cytoplasmic 2 (Gamr | gi 109489498 | 2  | 0.020 | LDLAGR           | 2    |
| 2 |                                                  |              |    | 0.020 | DLTDYLmK         | 2    |
| 3 | Malate dehydrogenase 2                           | gi 31982186  | 15 | 0.509 | VNVPVIGGHAGK     | 2, 3 |
| 3 |                                                  |              |    | 0.509 | NSPLVSR          | 2    |
| 3 |                                                  |              |    | 0.509 | GcDVVVIPAGVPR    | 2, 3 |

Supplementary Table 1.xls

|   |                                                                               |              |   |       |                       |      |
|---|-------------------------------------------------------------------------------|--------------|---|-------|-----------------------|------|
| 3 |                                                                               |              |   | 0.509 | TIIP LISQcTPK         | 2, 3 |
| 3 |                                                                               |              |   | 0.509 | ANTFVAELK             | 2    |
| 3 |                                                                               |              |   | 0.509 | VDFPQDQLATLTGR        | 2, 3 |
| 3 |                                                                               |              |   | 0.509 | IQEAGTEVVK            | 2    |
| 3 |                                                                               |              |   | 0.509 | MIAEAIPELK            | 2    |
| 3 |                                                                               |              |   | 0.509 | mIAEAIPELK            | 2    |
| 3 |                                                                               |              |   | 0.509 | ETEcTYFSTPLLLGK       | 2, 3 |
| 3 |                                                                               |              |   | 0.509 | IFGVTTLDIVR           | 2    |
| 3 |                                                                               |              |   | 0.509 | FVFSLVDAMNGK          | 2    |
| 3 |                                                                               |              |   | 0.509 | FVFSLVDAmNGK          | 2    |
| 3 |                                                                               |              |   | 0.509 | GcD V VVIPAGVPRKPGMTR | 3    |
| 3 |                                                                               |              |   | 0.509 | EGVVEcSFVQSK          | 2    |
| 3 |                                                                               |              |   | 0.509 | AGAGSATLSMAYAGAR      | 2    |
| 3 |                                                                               |              |   | 0.509 | AGAGSATLSmAYAGAR      | 2    |
| 3 |                                                                               |              |   | 0.509 | GYLGPEQLPDcLK         | 2    |
| 3 | ATP synthase alpha subunit precursor                                          | gi 114511    | 9 | 0.262 | APGIIPR               | 2    |
| 3 |                                                                               |              |   | 0.262 | ELIIGDR               | 2    |
| 3 |                                                                               |              |   | 0.262 | STVAQLVK              | 2    |
| 3 |                                                                               |              |   | 0.262 | VLSIGDGIAR            | 2    |
| 3 |                                                                               |              |   | 0.262 | AVDSLVIPIGR           | 2    |
| 3 |                                                                               |              |   | 0.262 | VVDALGNAIDGK          | 2    |
| 3 |                                                                               |              |   | 0.262 | TSAIDTIINQK           | 2    |
| 3 |                                                                               |              |   | 0.262 | TGTAE mSSILEER        | 2    |
| 3 |                                                                               |              |   | 0.262 | ILGADTSVDLEETGR       | 2    |
| 3 | PREDICTED: similar to glyceraldehyde-3-phosphate dehydrogenase                | gi 109484558 | 7 | 0.219 | VG VNGFGR             | 2    |
| 3 |                                                                               |              |   | 0.219 | ITG mAFR              | 2    |
| 3 |                                                                               |              |   | 0.219 | LVNNGKPITIFQER        | 3    |
| 3 |                                                                               |              |   | 0.219 | VVDL mAY mASK         | 2    |
| 3 |                                                                               |              |   | 0.219 | GAAQNIIPASTGAAK       | 2    |
| 3 |                                                                               |              |   | 0.219 | VVDL mAY mASKE        | 2    |
| 3 |                                                                               |              |   | 0.219 | IVSNAScTTNcLAPLAK     | 2    |
| 3 | Voltage-dependent anion channel 2                                             | gi 6755965   | 4 | 0.146 | SNFAVGYR              | 2    |
| 3 |                                                                               |              |   | 0.146 | LTLSALVDGK            | 2    |
| 3 |                                                                               |              |   | 0.146 | YQLDPTASISAK          | 2    |
| 3 |                                                                               |              |   | 0.146 | LTFD TTFSPNTGK        | 2    |
| 3 | Heterogeneous nuclear ribonucleoprotein A2/B1 isoform 1                       | gi 109134362 | 4 | 0.123 | LFVGGIK               | 2    |
| 3 |                                                                               |              |   | 0.123 | GGNFGFGDSR            | 2    |
| 3 |                                                                               |              |   | 0.123 | IDTIEITDR             | 2    |
| 3 |                                                                               |              |   | 0.123 | GGGGNFGPGPGSNFR       | 2    |
| 3 | Glyceraldehyde 3-phosphate dehydrogenase                                      | gi 41394411  | 2 | 0.121 | LTGMAFRVPTPDVSVVDLTcR | 3    |
| 3 |                                                                               |              |   | 0.121 | VPTPDVSVVDLTcR        | 2    |
| 3 | PREDICTED: similar to heterogeneous nuclear ribonucleoprotein A2/B1 isoform 1 | gi 88953883  | 2 | 0.100 | EDSQRPGAHLTVK         | 3    |
| 3 |                                                                               |              |   | 0.100 | IEVIEImTDR            | 2    |
| 3 | Electron transfer flavoprotein subunit alpha                                  | gi 21759113  | 2 | 0.093 | LGGEVScLVAGTK         | 2    |

Supplementary Table 1.xls

|   |                                                |              |    |       |                        |   |
|---|------------------------------------------------|--------------|----|-------|------------------------|---|
| 3 |                                                |              |    | 0.093 | GTSFEAAATSGGSASSEK     | 2 |
| 3 | L-3-hydroxyacyl-coenzyme A dehydrogenase       | gi 111038118 | 3  | 0.083 | AGDEFVEK               | 2 |
| 3 |                                                |              |    | 0.083 | LKNELFQR               | 2 |
| 3 |                                                |              |    | 0.083 | TFESLVDFcK             | 2 |
| 3 | Lactate dehydrogenase 1, A chain               | gi 6754524   | 2  | 0.057 | LVIITAGAR              | 2 |
| 3 |                                                |              |    | 0.057 | VTLTPEEEEAR            | 2 |
| 3 | NONA protein                                   | gi 75022134  | 2  | 0.042 | GGGGGGGGGGGGGGGGGGGGGR | 3 |
| 3 |                                                |              |    | 0.042 | ESDNERKK               | 2 |
| 3 | Hydroxysteroid (17-beta) dehydrogenase 4       | gi 31982273  | 3  | 0.033 | TLGAIVR                | 2 |
| 3 |                                                |              |    | 0.033 | TALDTFGR               | 2 |
| 3 |                                                |              |    | 0.033 | AYALAFAR               | 2 |
| 4 | Acyl-coenzyme A dehydrogenase, very long chain | gi 23956084  | 22 | 0.373 | TPIKDAATGAVK           | 3 |
| 4 |                                                |              |    | 0.373 | IHNFGVIQEK             | 3 |
| 4 |                                                |              |    | 0.373 | ELVGPVAR               | 2 |
| 4 |                                                |              |    | 0.373 | GILLYGTK               | 2 |
| 4 |                                                |              |    | 0.373 | SFAVGmFK               | 2 |
| 4 |                                                |              |    | 0.373 | SFGGVTHGLPEKK          | 3 |
| 4 |                                                |              |    | 0.373 | ITAFVVER               | 2 |
| 4 |                                                |              |    | 0.373 | YYTLNGSK               | 2 |
| 4 |                                                |              |    | 0.373 | ELTGLGNALK             | 2 |
| 4 |                                                |              |    | 0.373 | VAVNILNNGR             | 2 |
| 4 |                                                |              |    | 0.373 | VEDDTLQGLK             | 2 |
| 4 |                                                |              |    | 0.373 | DFQIEAAISK             | 2 |
| 4 |                                                |              |    | 0.373 | IFEGANDILR             | 2 |
| 4 |                                                |              |    | 0.373 | FFEEVNDPAK             | 2 |
| 4 |                                                |              |    | 0.373 | FGmAATLAGTmK           | 2 |
| 4 |                                                |              |    | 0.373 | LFVALQGcmDK            | 2 |
| 4 |                                                |              |    | 0.373 | GIVNEQFLLQR            | 2 |
| 4 |                                                |              |    | 0.373 | ENmASLQSSPQHQLFR       | 3 |
| 4 |                                                |              |    | 0.373 | ASNTSEVYFDGVK          | 2 |
| 4 |                                                |              |    | 0.373 | NPFGNVGLLmGEAGK        | 2 |
| 4 |                                                |              |    | 0.373 | VPSENVLGEVGDGFK        | 2 |
| 4 |                                                |              |    | 0.373 | AmVENGLVTGNPLGI        | 2 |
| 4 | Albumin 1                                      | gi 33859506  | 12 | 0.209 | LATDLTK                | 2 |
| 4 |                                                |              |    | 0.209 | QTALAELVK              | 2 |
| 4 |                                                |              |    | 0.209 | KYEATLEK               | 2 |
| 4 |                                                |              |    | 0.209 | TPVSEHVTK              | 2 |
| 4 |                                                |              |    | 0.209 | SLHTLFGDK              | 2 |
| 4 |                                                |              |    | 0.209 | ccSGSLVER              | 2 |
| 4 |                                                |              |    | 0.209 | LVQEVTDFAK             | 2 |
| 4 |                                                |              |    | 0.209 | YNDLGEQHFK             | 2 |
| 4 |                                                |              |    | 0.209 | AADKDTcFSTEGPNLVTR     | 3 |
| 4 |                                                |              |    | 0.209 | APQVSTPTLVEAAR         | 2 |
| 4 |                                                |              |    | 0.209 | YmcENQATISSK           | 2 |

Supplementary Table 1.xls

|   |                                                   |              |    |       |                 |      |
|---|---------------------------------------------------|--------------|----|-------|-----------------|------|
| 4 |                                                   |              |    | 0.209 | ENYGELADccTK    | 2    |
| 4 | Sdha protein                                      | gi 15030102  | 12 | 0.203 | AFGGQSLK        | 2    |
| 4 |                                                   |              |    | 0.203 | SmTLEIR         | 2    |
| 4 |                                                   |              |    | 0.203 | ANAGEESVmNLDK   | 2, 3 |
| 4 |                                                   |              |    | 0.203 | ANAGEESVMNLDK   | 2    |
| 4 |                                                   |              |    | 0.203 | GVIAlcIEDGSIHR  | 3    |
| 4 |                                                   |              |    | 0.203 | HTLSYVDIK       | 2    |
| 4 |                                                   |              |    | 0.203 | TLNEADcATVPPAIR | 2,3  |
| 4 |                                                   |              |    | 0.203 | NTVIATGGYGR     | 2    |
| 4 |                                                   |              |    | 0.203 | SmQNHAAVFR      | 2    |
| 4 |                                                   |              |    | 0.203 | VGSVLQEGcEK     | 2    |
| 4 |                                                   |              |    | 0.203 | GEGGILINSQGER   | 2    |
| 4 |                                                   |              |    | 0.203 | VTLEYRPVIDK     | 2    |
| 4 |                                                   |              |    | 0.203 | TGHSLLTLYGR     | 2    |
| 4 | Transferrin                                       | gi 17046471  | 5  | 0.067 | IPSHAVVAR       | 3    |
| 4 |                                                   |              |    | 0.067 | DSAFGLLR        | 2    |
| 4 |                                                   |              |    | 0.067 | DGGGDVAFVK      | 2    |
| 4 |                                                   |              |    | 0.067 | GYAVAVVK        | 2    |
| 4 |                                                   |              |    | 0.067 | HTTIFEVLPEK     | 2    |
| 4 | Lamin A                                           | gi 1346413   | 4  | 0.060 | KEGDLLAAQAR     | 3    |
| 4 |                                                   |              |    | 0.060 | LADALQELR       | 2    |
| 4 |                                                   |              |    | 0.060 | SLETENAGLR      | 2    |
| 4 |                                                   |              |    | 0.060 | ITSEEVVSR       | 2    |
| 4 | Transketolase                                     | gi 11066098  | 3  | 0.047 | SGKPAELLK       | 3    |
| 4 |                                                   |              |    | 0.047 | LAVSQVPR        | 2    |
| 4 |                                                   |              |    | 0.047 | IIALDGDTK       | 2    |
| 4 | Hypothetical protein                              | gi 55727397  | 3  | 0.042 | CLVEILASR       | 3    |
| 4 |                                                   |              |    | 0.042 | ILISLATGNR      | 2    |
| 4 |                                                   |              |    | 0.042 | SELDmLDIR       | 2    |
| 4 | Electron transferring flavoprotein, dehydrogenase | gi 21313290  | 2  | 0.037 | SGSLAAESIFK     | 2    |
| 4 |                                                   |              |    | 0.037 | GAPLNTPVTEDR    | 2    |
| 4 | PREDICTED: similar to Actin, cytoplasmic 2 (Gam   | gi 109489498 | 2  | 0.026 | AGFAGDDAPR      | 2    |
| 4 |                                                   |              |    | 0.026 | DLTDYLmK        | 2    |
| 4 | Laminin, alpha 2                                  | gi 117647249 | 2  | 0.007 | LEVHLSSGTR      | 3    |
| 4 |                                                   |              |    | 0.007 | INHADFATVQLR    | 3    |
| 6 | Malate dehydrogenase 2                            | gi 31982186  | 16 | 0.530 | VNVPVIGGHAGK    | 2, 3 |
| 6 |                                                   |              |    | 0.530 | NSPLVSR         | 2    |
| 6 |                                                   |              |    | 0.530 | ITPFEEK         | 2    |
| 6 |                                                   |              |    | 0.530 | GcDVVVIPAGVPR   | 2, 3 |
| 6 |                                                   |              |    | 0.530 | FVFSLVDAmNGK    | 2, 3 |
| 6 |                                                   |              |    | 0.530 | TIIP LISQcTPK   | 2, 3 |
| 6 |                                                   |              |    | 0.530 | ANTFVAELK       | 2    |
| 6 |                                                   |              |    | 0.530 | VDFPQDQLATLTGR  | 2, 3 |
| 6 |                                                   |              |    | 0.530 | IQEAGTEVVK      | 2    |

Supplementary Table 1.xls

|   |                                                                |               |    |       |                     |      |
|---|----------------------------------------------------------------|---------------|----|-------|---------------------|------|
| 6 |                                                                |               |    | 0.530 | MIAEAIPELK          | 2    |
| 6 |                                                                |               |    | 0.530 | mIAEAIPELK          | 2    |
| 6 |                                                                |               |    | 0.530 | IFGVTTLDIVR         | 2    |
| 6 |                                                                |               |    | 0.530 | GcDVVVIPAGVPRKPGMTR | 3    |
| 6 |                                                                |               |    | 0.530 | EGVVEcSFVQSK        | 2    |
| 6 |                                                                |               |    | 0.530 | AGAGSATLSMAYAGAR    | 2    |
| 6 |                                                                |               |    | 0.530 | AGAGSATLSmAYAGAR    | 2    |
| 6 |                                                                |               |    | 0.530 | GYLGPEQLPDcLK       | 2    |
| 6 |                                                                |               |    | 0.530 | ETEcTYFSTPLLLGK     | 2    |
| 6 | ATP synthase alpha subunit precursor                           | gi 114511     | 7  | 0.220 | STVAQLVK            | 2    |
| 6 |                                                                |               |    | 0.220 | VLSIGDGIAR          | 2    |
| 6 |                                                                |               |    | 0.220 | AVDSLVIPIGR         | 2    |
| 6 |                                                                |               |    | 0.220 | VVDALGNAIDGK        | 2    |
| 6 |                                                                |               |    | 0.220 | HALIIYDDLK          | 2    |
| 6 |                                                                |               |    | 0.220 | TGTAEmSSILEER       | 2    |
| 6 |                                                                |               |    | 0.220 | ILGADTSVDLEETGR     | 2    |
| 6 | Heterogeneous nuclear ribonucleoprotein A2/B1 isoform 1        | gi 109134362  | 3  | 0.103 | GGNFGFGDSR          | 2    |
| 6 |                                                                |               |    | 0.103 | IDTIEIITDR          | 2    |
| 6 |                                                                |               |    | 0.103 | GGGGNFGPGPSNFR      | 2    |
| 6 | PREDICTED: similar to glyceraldehyde-3-phosphate dehydrogenase | gi 109484558  | 4  | 0.102 | ITGmAFR             | 2    |
| 6 |                                                                |               |    | 0.102 | VVDLmAYmASK         | 2    |
| 6 |                                                                |               |    | 0.102 | GAAQNIIPASTGAAK     | 2    |
| 6 |                                                                |               |    | 0.102 | VVDLmAYmASKE        | 2    |
| 6 | NADH dehydrogenase (ubiquinone) 1 alpha subunit                | gi 13384720   | 4  | 0.090 | GIVNATK             | 2    |
| 6 |                                                                |               |    | 0.090 | YVVNHLGR            | 2    |
| 6 |                                                                |               |    | 0.090 | TFAFTGPNR           | 2    |
| 6 |                                                                |               |    | 0.090 | QPVYVADVSK          | 2    |
| 6 | ELAV (embryonic lethal, abnormal vision, Drosophila)           | gi 31542602   | 2  | 0.061 | AISTLNGLR           | 2    |
| 6 |                                                                |               |    | 0.061 | VLVDQTTGLSR         | 2    |
| 6 | L-3-hydroxyacyl-coenzyme A dehydrogenase                       | gi 1111038118 | 2  | 0.054 | AGDEFVEK            | 2    |
| 6 |                                                                |               |    | 0.054 | DTPGFIVNR           | 2    |
| 6 | Succinate-CoA ligase                                           | gi 9845299    | 2  | 0.054 | LVGGTTPGK           | 2    |
| 6 |                                                                |               |    | 0.054 | IlcQGFTGK           | 2    |
| 6 | Hydroxysteroid (17-beta) dehydrogenase 4                       | gi 31982273   | 4  | 0.048 | VVAEIR              | 2    |
| 6 |                                                                |               |    | 0.048 | TALDTFGR            | 2    |
| 6 |                                                                |               |    | 0.048 | AYALFAER            | 2    |
| 6 |                                                                |               |    | 0.048 | IDVVVNNAGILR        | 2    |
| 6 | Elongation factor-1 alpha                                      | gi 85013643   | 2  | 0.041 | HVDSGK              | 2    |
| 6 |                                                                |               |    | 0.041 | IGGIGTVPVGR         | 2    |
| 7 | Acyl-coenzyme A dehydrogenase, medium chain                    | gi 15488707   | 11 | 0.273 | KGDEYVINGQK         | 2, 3 |
| 7 |                                                                |               |    | 0.273 | IAmGAFDR            | 2    |
| 7 |                                                                |               |    | 0.273 | GIAFEDVR            | 2    |
| 7 |                                                                |               |    | 0.273 | mWITNGGK            | 2    |
| 7 |                                                                |               |    | 0.273 | TRPTVAAGAVGLAQR     | 2, 3 |

Supplementary Table 1.xls

|   |                                                  |              |    |       |                    |      |
|---|--------------------------------------------------|--------------|----|-------|--------------------|------|
| 7 |                                                  |              |    | 0.273 | AAWEVDSGR          | 2    |
| 7 |                                                  |              |    | 0.273 | NTYYASIAK          | 2    |
| 7 |                                                  |              |    | 0.273 | IYQIYEGTAQIQR      | 2, 3 |
| 7 |                                                  |              |    | 0.273 | SGEYPPFLIK         | 2    |
| 7 |                                                  |              |    | 0.273 | ENVLIGEGAGFK       | 2    |
| 7 |                                                  |              |    | 0.273 | EEIIPVAPEYDK       | 2    |
| 7 | Creatine kinase, mitochondrial 2                 | gi 38259206  | 10 | 0.258 | GLSLPPAcSR         | 2    |
| 7 |                                                  |              |    | 0.258 | REVENVAITALEGLK    | 3    |
| 7 |                                                  |              |    | 0.258 | ITHGQFDER          | 2    |
| 7 |                                                  |              |    | 0.258 | VPPPLPQFGR         | 2    |
| 7 |                                                  |              |    | 0.258 | GWEFmWNER          | 2    |
| 7 |                                                  |              |    | 0.258 | HNNcmAEcLTPTIYAK   | 3    |
| 7 |                                                  |              |    | 0.258 | LSEMTEQDQQR        | 2    |
| 7 |                                                  |              |    | 0.258 | LFPPSADYPDLR       | 2    |
| 7 |                                                  |              |    | 0.258 | EVENVAITALEGLK     | 2    |
| 7 |                                                  |              |    | 0.258 | LGYILTcPSNLGTGLR   | 2    |
| 7 | Phosphoglycerate kinase 1                        | gi 129903    | 9  | 0.249 | SLmDEVVK           | 2    |
| 7 |                                                  |              |    | 0.249 | LTLDKLDVK          | 2    |
| 7 |                                                  |              |    | 0.249 | VLPGVDALSNV        | 2    |
| 7 |                                                  |              |    | 0.249 | VADKIQLINmLDK      | 3    |
| 7 |                                                  |              |    | 0.249 | LGDVYVNDAFGTAHR    | 3    |
| 7 |                                                  |              |    | 0.249 | VSHVSTGGGASLELEGK  | 3    |
| 7 |                                                  |              |    | 0.249 | IQLINmLDK          | 2    |
| 7 |                                                  |              |    | 0.249 | YSLEPVAAELK        | 2    |
| 7 |                                                  |              |    | 0.249 | VLNNmEIGTSLYDEEGAK | 2    |
| 7 | Isocitrate dehydrogenase [NADP], mitochondrial p | gi 116242519 | 10 | 0.200 | FAQTLEK            | 2    |
| 7 |                                                  |              |    | 0.200 | TIEAEAAHGTVTR      | 3    |
| 7 |                                                  |              |    | 0.200 | ATDFVVD            | 2    |
| 7 |                                                  |              |    | 0.200 | WPLYLSTK           | 2    |
| 7 |                                                  |              |    | 0.200 | LDGNQDLIR          | 2    |
| 7 |                                                  |              |    | 0.200 | YFDLGLPNR          | 2    |
| 7 |                                                  |              |    | 0.200 | cATITPDEAR         | 2    |
| 7 |                                                  |              |    | 0.200 | LIDDmVAQVLK        | 2    |
| 7 |                                                  |              |    | 0.200 | VcVQTVESGAmTK      | 2    |
| 7 |                                                  |              |    | 0.200 | DQTNDQVTIDSALATQK  | 2    |
| 7 | Aspartate aminotransferase                       | gi 6754034   | 6  | 0.155 | IGADFLGR           | 2    |
| 7 |                                                  |              |    | 0.155 | VGNLTVVGK          | 2    |
| 7 |                                                  |              |    | 0.155 | QVEYLVNEK          | 2    |
| 7 |                                                  |              |    | 0.155 | LVLGDNSPAIR        | 2    |
| 7 |                                                  |              |    | 0.155 | VGGVQSLGGTGALR     | 2    |
| 7 |                                                  |              |    | 0.155 | IVAATLSDPELFK      | 2    |
| 7 | Ubiquinol-cytochrome c reductase core protein 2  | gi 22267442  | 5  | 0.143 | YEDSNLGTSHLLR      | 3    |
| 7 |                                                  |              |    | 0.143 | AVAFQNSQTR         | 2    |
| 7 |                                                  |              |    | 0.143 | ENmAYTVEGIR        | 2    |

Supplementary Table 1.xls

|    |                                      |             |    |       |                   |      |
|----|--------------------------------------|-------------|----|-------|-------------------|------|
| 7  |                                      |             |    | 0.143 | GNNTTSLLSQSVAK    | 2    |
| 7  |                                      |             |    | 0.143 | AVAQGNLSSADVQAAK  | 2    |
| 7  | Creatine kinase, muscle              | gi 6671762  | 4  | 0.110 | LANLSK            | 2    |
| 7  |                                      |             |    | 0.110 | DLFDPIIQDR        | 2    |
| 7  |                                      |             |    | 0.110 | GQSIDDmIPAQK      | 2    |
| 7  |                                      |             |    | 0.110 | GGDDLDPNYVLSSR    | 2    |
| 7  | Pyruvate dehydrogenase E1 alpha 1    | gi 6679261  | 5  | 0.105 | GDFIPGLR          | 2    |
| 7  |                                      |             |    | 0.105 | AILAELTGR         | 2    |
| 7  |                                      |             |    | 0.105 | RGDFIPGLR         | 2    |
| 7  |                                      |             |    | 0.105 | VDGmDILcVR        | 2    |
| 7  |                                      |             |    | 0.105 | LEEGPPVTTVLTR     | 2    |
| 7  | Citrate synthase                     | gi 13385942 | 5  | 0.097 | ALGFPLERP         | 2, 3 |
| 7  |                                      |             |    | 0.097 | DVLSNLIPK         | 2    |
| 7  |                                      |             |    | 0.097 | EGSSIGAIDSR       | 2    |
| 7  |                                      |             |    | 0.097 | NLYREGSSIGAIDSR   | 3    |
| 7  |                                      |             |    | 0.097 | IVPNILLEQGK       | 2    |
| 7  | ATP synthase alpha subunit precursor | gi 114511   | 3  | 0.084 | STVAQLVK          | 2    |
| 7  |                                      |             |    | 0.084 | AVDSLVPIGR        | 2    |
| 7  |                                      |             |    | 0.084 | VVDALGNAIDGK      | 2    |
| 7  | 47-kDa heat shock protein            | gi 303678   | 2  | 0.048 | AVAISLPK          | 2    |
| 7  |                                      |             |    | 0.048 | DNQSGSLLFIGR      | 2    |
| 7  | Fumarase                             | gi 227665   | 2  | 0.038 | FLGSGPR           | 2    |
| 7  |                                      |             |    | 0.038 | AIEmLGGELGSK      | 2    |
| 11 | Aconitase 2                          | gi 18079339 | 19 | 0.262 | IHETNLKK          | 2, 3 |
| 11 |                                      |             |    | 0.262 | qALAHGLK          | 2    |
| 11 |                                      |             |    | 0.262 | EHAALPR           | 2    |
| 11 |                                      |             |    | 0.262 | DGYAQILR          | 2    |
| 11 |                                      |             |    | 0.262 | DFAPGKPLK         | 2    |
| 11 |                                      |             |    | 0.262 | EGWPLDIR          | 2    |
| 11 |                                      |             |    | 0.262 | VDVSPTSQR         | 2    |
| 11 |                                      |             |    | 0.262 | VAmSHFEPSEYIR     | 2, 3 |
| 11 |                                      |             |    | 0.262 | NAVVTQEFQVPDPTAR  | 2, 3 |
| 11 |                                      |             |    | 0.262 | DLEDLQILIK        | 2    |
| 11 |                                      |             |    | 0.262 | LEAPDADELPR       | 2    |
| 11 |                                      |             |    | 0.262 | LTGSLSGWTSPK      | 2    |
| 11 |                                      |             |    | 0.262 | VGLIGScTNSSYEDmGR | 2, 3 |
| 11 |                                      |             |    | 0.262 | TDIANLAEFK        | 2    |
| 11 |                                      |             |    | 0.262 | FNPETDFLTGK       | 2    |
| 11 |                                      |             |    | 0.262 | SQFTITPGSEQIR     | 2    |
| 11 |                                      |             |    | 0.262 | FKLEAPDADELPR     | 2    |
| 11 |                                      |             |    | 0.262 | WVIGDENYEGSSR     | 2    |
| 11 |                                      |             |    | 0.262 | IVYGHLDLDPANQEIER | 2    |
| 16 | Transgelin 2                         | gi 30519911 | 7  | 0.357 | DGTVLcK           | 2    |
| 16 |                                      |             |    | 0.357 | GPSYGLSR          | 2    |

Supplementary Table 1.xls



|    |                                                  |              |   |       |                      |      |
|----|--------------------------------------------------|--------------|---|-------|----------------------|------|
| 16 |                                                  |              |   | 0.357 | IQASSmAFK            | 2    |
| 16 |                                                  |              |   | 0.357 | LINSLYPEGQAPVK       | 2, 3 |
| 16 |                                                  |              |   | 0.357 | EDVGQPQPGR           | 2    |
| 16 |                                                  |              |   | 0.357 | TLmNLGGLAVAR         | 2    |
| 16 |                                                  |              |   | 0.357 | NFSDNQLQEGK          | 2    |
| 16 | ADP-ribosylation Factor 1                        | gi 1065361   | 5 | 0.278 | TTILYK               | 2    |
| 16 |                                                  |              |   | 0.278 | mLAEDELRL            | 2    |
| 16 |                                                  |              |   | 0.278 | ILMVGLDAAGK          | 2    |
| 16 |                                                  |              |   | 0.278 | ILmVGLDAAGK          | 2    |
| 16 |                                                  |              |   | 0.278 | DAVLLVFANK           | 2    |
| 16 |                                                  |              |   | 0.278 | QDLPNA mNAAEITDK     | 2, 3 |
| 16 | ADP-ribosylation factor 4                        | gi 6680720   | 2 | 0.233 | IQEGAAVLQK           | 2    |
| 16 |                                                  |              |   | 0.233 | QDLPNAMAISEMTDK      | 2    |
| 16 | Heat shock protein family, member 7 (cardiovascu | gi 31542970  | 3 | 0.225 | LAADGTVmNTFAHK       | 2, 3 |
| 16 |                                                  |              |   | 0.225 | TLGDAYEFTVDmR        | 2, 3 |
| 16 |                                                  |              |   | 0.225 | ALPAQDPPmEK          | 2    |
| 16 | Ferritin light chain 1                           | gi 120524    | 4 | 0.224 | LVNLHLR              | 2    |
| 16 |                                                  |              |   | 0.224 | LLEFQNDR             | 2    |
| 16 |                                                  |              |   | 0.224 | TQEAmEAALAmEK        | 2    |
| 16 |                                                  |              |   | 0.224 | QNYSTEVEAAVNR        | 2    |
| 16 | Myosin light polypeptide 3                       | gi 33563264  | 3 | 0.216 | EAEFDASK             | 2    |
| 16 |                                                  |              |   | 0.216 | AAPAPAAAAPAAAPEPERPK | 3    |
| 16 |                                                  |              |   | 0.216 | ALGQNPTQAEVLR        | 2    |
| 16 | Transgelin                                       | gi 6755714   | 4 | 0.179 | NGVILSK              | 2    |
| 16 |                                                  |              |   | 0.179 | AAEDYGVK             | 2    |
| 16 |                                                  |              |   | 0.179 | KYDEELEER            | 2    |
| 16 |                                                  |              |   | 0.179 | VPENPPSmVFK          | 2    |
| 16 | Hypothetical protein LOC67939                    | gi 21312706  | 3 | 0.172 | QLGVGSGNLR           | 2    |
| 16 |                                                  |              |   | 0.172 | QINLNDLGK            | 2    |
| 16 |                                                  |              |   | 0.172 | FADETA mLEK          | 2    |
| 16 | Myosin light chain 2                             | gi 1709058   | 3 | 0.157 | VFDPEGK              | 2    |
| 16 |                                                  |              |   | 0.157 | EmLTTQAER            | 2    |
| 16 |                                                  |              |   | 0.157 | EAFTImDQNR           | 2    |
| 16 | Peroxiredoxin-3                                  | gi 6680690   | 3 | 0.113 | ELSLDDFK             | 2    |
| 16 |                                                  |              |   | 0.113 | GTAVVNGEFK           | 2    |
| 16 |                                                  |              |   | 0.113 | HLSVNDLPVGR          | 2    |
| 16 | Ubiquinone biosynthesis protein coq7             | gi 3806019   | 2 | 0.112 | TSVGPVIQK            | 2    |
| 16 |                                                  |              |   | 0.112 | IYAGQmAVLGR          | 2    |
| 16 | Heat shock protein, alpha-crystallin-related, B6 | gi 59958370  | 2 | 0.111 | LFDQR                | 2    |
| 16 |                                                  |              |   | 0.111 | ASAPLPGFSAPGR        | 2    |
| 16 | ATP synthase alpha subunit precursor             | gi 114511    | 3 | 0.075 | APGIIPR              | 2    |
| 16 |                                                  |              |   | 0.075 | VLSIGDGIAR           | 2    |
| 16 |                                                  |              |   | 0.075 | AVDSLVPIGR           | 2    |
| 16 | PREDICTED: similar to Actin, cytoplasmic 2 (Gam  | gi 109489498 | 2 | 0.027 | DLTDYLmK             | 2    |

Supplementary Table 1.xls

|    |                                                 |              |    |       |                   |   |
|----|-------------------------------------------------|--------------|----|-------|-------------------|---|
| 16 |                                                 |              |    | 0.027 | EITALAPSTmK       | 2 |
| 17 | Ferritin light chain 1                          | gi 120524    | 3  | 0.186 | LLEFQNDR          | 2 |
| 17 |                                                 |              |    | 0.186 | TQEAmEAALAmEK     | 2 |
| 17 |                                                 |              |    | 0.186 | QNYSTEVEAAVNR     | 2 |
| 17 | Fibronectin 1                                   | gi 46849812  | 16 | 0.070 | LTAGLTR           | 2 |
| 17 |                                                 |              |    | 0.070 | ITGYIIK           | 2 |
| 17 |                                                 |              |    | 0.070 | LGVRPSQGGEAPR     | 3 |
| 17 |                                                 |              |    | 0.070 | VFAVHQGR          | 2 |
| 17 |                                                 |              |    | 0.070 | APITGYIIR         | 2 |
| 17 |                                                 |              |    | 0.070 | GDSPASSKPVSINYK   | 3 |
| 17 |                                                 |              |    | 0.070 | YEVSVYALK         | 2 |
| 17 |                                                 |              |    | 0.070 | QYNVGPLASK        | 2 |
| 17 |                                                 |              |    | 0.070 | HALQSASAGSGSFTDVR | 3 |
| 17 |                                                 |              |    | 0.070 | FTNIGPDTmR        | 2 |
| 17 |                                                 |              |    | 0.070 | TVLVTWTPPR        | 2 |
| 17 |                                                 |              |    | 0.070 | TFYScTTEGR        | 2 |
| 17 |                                                 |              |    | 0.070 | VTYSSPEDGIR       | 2 |
| 17 |                                                 |              |    | 0.070 | ATGVFTTLQPLR      | 2 |
| 17 |                                                 |              |    | 0.070 | ESNPLTAQQTTK      | 2 |
| 17 |                                                 |              |    | 0.070 | SYTITGLQPGTDYK    | 2 |
| 17 | Actinin alpha 2                                 | gi 21307732  | 6  | 0.069 | ALDYIASK          | 2 |
| 17 |                                                 |              |    | 0.069 | VIQSYSIR          | 2 |
| 17 |                                                 |              |    | 0.069 | DYESASLTEVR       | 2 |
| 17 |                                                 |              |    | 0.069 | GITQEQmNEFR       | 2 |
| 17 |                                                 |              |    | 0.069 | QSILAIQNEVEK      | 2 |
| 17 |                                                 |              |    | 0.069 | TINEVETQILTR      | 2 |
| 17 | PREDICTED: similar to Actin, cytoplasmic 2 (Gam | gi 109489498 | 5  | 0.065 | LDLAGR            | 2 |
| 17 |                                                 |              |    | 0.065 | AGFAGDDAPR        | 2 |
| 17 |                                                 |              |    | 0.065 | DLTDYLmK          | 2 |
| 17 |                                                 |              |    | 0.065 | GYSFTTTAER        | 2 |
| 17 |                                                 |              |    | 0.065 | DSYVGDEAQSK       | 2 |
| 17 | Albumin 1                                       | gi 33859506  | 4  | 0.063 | ALVSSVR           | 2 |
| 17 |                                                 |              |    | 0.063 | LATDLTK           | 2 |
| 17 |                                                 |              |    | 0.063 | LVQEVTDFAK        | 2 |
| 17 |                                                 |              |    | 0.063 | APQVSTPTLVEAAR    | 2 |
| 17 | Tenascin-C                                      | gi 7106435   | 10 | 0.042 | VPEVTR            | 2 |
| 17 |                                                 |              |    | 0.042 | SIPVSAR           | 2 |
| 17 |                                                 |              |    | 0.042 | SVDLPGLK          | 2 |
| 17 |                                                 |              |    | 0.042 | VSIYGVAR          | 2 |
| 17 |                                                 |              |    | 0.042 | AYAAGFGDR         | 2 |
| 17 |                                                 |              |    | 0.042 | IQALSGSLR         | 2 |
| 17 |                                                 |              |    | 0.042 | FTTDLDSR          | 2 |
| 17 |                                                 |              |    | 0.042 | APTAQVESFR        | 2 |
| 17 |                                                 |              |    | 0.042 | TPmLSTDVSTAR      | 2 |

Supplementary Table 1.xls

|    |                                            |              |   |       |                  |      |
|----|--------------------------------------------|--------------|---|-------|------------------|------|
| 17 |                                            |              |   | 0.042 | VSVIAmK          | 1    |
| 17 | Procollagen, type VI, alpha 1              | gi 6753484   | 2 | 0.018 | IALVITDGR        | 2    |
| 17 |                                            |              |   | 0.018 | VPNYQALLR        | 2    |
| 17 | PREDICTED: similar to myosin heavy chain 6 | gi 109082950 | 5 | 0.014 | SLSTELFK         | 2    |
| 17 |                                            |              |   | 0.014 | LQDAEEAVEAVNAK   | 3    |
| 17 |                                            |              |   | 0.014 | SLNDFTTQR        | 2    |
| 17 |                                            |              |   | 0.014 | TLEDQANEYR       | 2    |
| 17 |                                            |              |   | 0.014 | LAEQELIETSER     | 2    |
| 17 | Spectrin alpha 2                           | gi 115496850 | 2 | 0.008 | GLVSSDELAK       | 2    |
| 17 |                                            |              |   | 0.008 | SSEEIESAFR       | 2    |
| 18 | Triosephosphate isomerase                  | gi 1864018   | 7 | 0.371 | TATPQQAQEVHEK    | 3    |
| 18 |                                            |              |   | 0.371 | RHVFGESEDELIGQK  | 3    |
| 18 |                                            |              |   | 0.371 | IAVAAQNcYK       | 2    |
| 18 |                                            |              |   | 0.371 | SNVNDGVAQSTR     | 2    |
| 18 |                                            |              |   | 0.371 | IYGGSVTGATcK     | 2    |
| 18 |                                            |              |   | 0.371 | HVFGESEDELIGQK   | 2    |
| 18 |                                            |              |   | 0.371 | VTNGAFTGEISPGmIK | 2    |
| 18 | Growth factor receptor bound protein 2     | gi 123228035 | 6 | 0.300 | DGFIPK           | 2    |
| 18 |                                            |              |   | 0.300 | FGNDVQHFK        | 2, 3 |
| 18 |                                            |              |   | 0.300 | QRHDGAFLIR       | 3    |
| 18 |                                            |              |   | 0.300 | ATADDELSFK       | 2    |
| 18 |                                            |              |   | 0.300 | ESESAPGDFSLSVK   | 2    |
| 18 |                                            |              |   | 0.300 | VLNEEcDQNWYK     | 2    |
| 18 | Heat shock protein HSP27                   | gi 424145    | 6 | 0.249 | AQIGGPEAGK       | 2    |
| 18 |                                            |              |   | 0.249 | EGVVEITGK        | 2    |
| 18 |                                            |              |   | 0.249 | DWYPAHSR         | 2    |
| 18 |                                            |              |   | 0.249 | QLSSGVSEIR       | 2    |
| 18 |                                            |              |   | 0.249 | LFDQAFGVPR       | 2    |
| 18 |                                            |              |   | 0.249 | TKEGVVEITGK      | 2    |
| 18 |                                            |              |   | 0.249 | qLSSGVSEIR       | 1    |
| 18 | Peroxiredoxin-6                            | gi 3219774   | 6 | 0.223 | VVFIFGPDKK       | 3    |
| 18 |                                            |              |   | 0.223 | VVFIFGPDK        | 2    |
| 18 |                                            |              |   | 0.223 | LPFPIIDDK        | 2    |
| 18 |                                            |              |   | 0.223 | LPFPIIDDKGR      | 2    |
| 18 |                                            |              |   | 0.223 | DINAYNGETPTEK    | 2    |
| 18 |                                            |              |   | 0.223 | GESVmVPTLSEEEAK  | 2    |
| 18 | Peroxiredoxin-1                            | gi 6754976   | 4 | 0.221 | SVDEIIR          | 2    |
| 18 |                                            |              |   | 0.221 | DISLSEYK         | 2    |
| 18 |                                            |              |   | 0.221 | TIAQDYGVLK       | 2    |
| 18 |                                            |              |   | 0.221 | ATAVmPDGQFK      | 2    |
| 18 | GrpE-like 1, mitochondrial                 | gi 13277394  | 4 | 0.171 | TLRPALVGVVK      | 2, 3 |
| 18 |                                            |              |   | 0.171 | AKLEEQLR         | 2    |
| 18 |                                            |              |   | 0.171 | ALADTENLR        | 2    |
| 18 |                                            |              |   | 0.171 | LYGIQGFcK        | 2    |

Supplementary Table 1.xls

|    |                                                      |              |   |       |                 |      |
|----|------------------------------------------------------|--------------|---|-------|-----------------|------|
| 18 | RNA binding protein gene with multiple splicing iso  | gi 33342267  | 3 | 0.168 | NALNGIR         | 2    |
| 18 |                                                      |              |   | 0.168 | QPVGFVSFDSR     | 2    |
| 18 |                                                      |              |   | 0.168 | ENTPSEANLQEEEV  | 2    |
| 18 | Peroxiredoxin-4                                      | gi 7948999   | 5 | 0.168 | QGGLGPIR        | 2    |
| 18 |                                                      |              |   | 0.168 | SVDETLR         | 2    |
| 18 |                                                      |              |   | 0.168 | GLFIIDDK        | 2    |
| 18 |                                                      |              |   | 0.168 | IPLLSDLNHQISK   | 3    |
| 18 |                                                      |              |   | 0.168 | LVQAFQYTDK      | 2    |
| 18 | Harvey rat sarcoma oncogene, subgroup R              | gi 6677819   | 4 | 0.165 | LVVVGGGGVVK     | 2    |
| 18 |                                                      |              |   | 0.165 | DRDDFPIVLVGNK   | 2, 3 |
| 18 |                                                      |              |   | 0.165 | IcTVDGIPAR      | 2    |
| 18 |                                                      |              |   | 0.165 | VKDRDDFPIVLVGNK | 3    |
| 18 | Ig kappa chain                                       | gi 1083380   | 3 | 0.160 | TSTSPIVK        | 2    |
| 18 |                                                      |              |   | 0.160 | FSGSGSGTDFTLK   | 2    |
| 18 |                                                      |              |   | 0.160 | QNGVLNSWTDQDSK  | 2    |
| 18 | ETHE1 protein                                        | gi 12963539  | 3 | 0.146 | EAVLIDPVLETAHR  | 3    |
| 18 |                                                      |              |   | 0.146 | SLLPGcQSVISR    | 2    |
| 18 |                                                      |              |   | 0.146 | ScTYTYLLGDR     | 2    |
| 18 | Proteasome subunit, beta type 10                     | gi 13435741  | 4 | 0.143 | IHFIAPK         | 2    |
| 18 |                                                      |              |   | 0.143 | DGVLGADTR       | 2    |
| 18 |                                                      |              |   | 0.143 | FAPGTTPVLTR     | 2    |
| 18 |                                                      |              |   | 0.143 | ALSTPTEPVQR     | 2    |
| 18 | Protein-L-isoaspartate (D-aspartate) O-methyltrans   | gi 29436595  | 5 | 0.142 | KDDPmLLSSGR     | 3    |
| 18 |                                                      |              |   | 0.142 | VIGIDHIK        | 2    |
| 18 |                                                      |              |   | 0.142 | DDPmLLSSGR      | 2    |
| 18 |                                                      |              |   | 0.142 | VFEVmLATDR      | 2    |
| 18 |                                                      |              |   | 0.142 | ELVDDSITNVK     | 2    |
| 18 | PDGFA associated protein 1, isoform CRA_a            | gi 119597080 | 2 | 0.125 | VTQLDLDGPK      | 2    |
| 18 |                                                      |              |   | 0.125 | GVEGLIDIENPNR   | 2    |
| 18 | Tmed9 protein                                        | gi 48474619  | 2 | 0.107 | TQLYDK          | 2    |
| 18 |                                                      |              |   | 0.107 | QLVEQVEQIQK     | 2    |
| 18 | Dlst protein                                         | gi 23271834  | 2 | 0.104 | LGFmSAFVK       | 2    |
| 18 |                                                      |              |   | 0.104 | NVETmNYADIER    | 2    |
| 18 | Dynactin 6                                           | gi 6756009   | 2 | 0.095 | GDVTIGPR        | 2    |
| 18 |                                                      |              |   | 0.095 | mGDNNVIESK      | 2    |
| 18 | Electron transferring flavoprotein, beta polypeptide | gi 38142460  | 2 | 0.082 | AGDLGVDLTSK     | 2    |
| 18 |                                                      |              |   | 0.082 | VETTEDLVAK      | 2    |
| 18 | Voltage-dependent anion channel 1                    | gi 10720404  | 2 | 0.081 | VTQSNFAVGYK     | 2    |
| 18 |                                                      |              |   | 0.081 | LTFDSSFSPNTGK   | 2    |
| 18 | PDZ and LIM domain protein 1                         | gi 78099787  | 2 | 0.073 | DFEQPLAISR      | 2    |
| 18 |                                                      |              |   | 0.073 | SAmPFTASPAPSTR  | 2    |
| 18 | Triosephosphate isomerase                            | gi 71370922  | 2 | 0.067 | HVFGESDELIGEK   | 3    |
| 18 |                                                      |              |   | 0.067 | RHVFGESDELIGEK  | 3    |
| 18 | Ubiquinol-cytochrome c reductase, Rieske iron-sul    | gi 13385168  | 3 | 0.062 | AEVLDSTK        | 2    |

Supplementary Table 1.xls

|    |                                                      |             |   |       |                  |      |
|----|------------------------------------------------------|-------------|---|-------|------------------|------|
| 18 |                                                      |             |   | 0.062 | VPDFSDYR         | 2    |
| 18 |                                                      |             |   | 0.062 | RAEVL DSTK       | 2    |
| 18 | Albumin 1                                            | gi 33859506 | 3 | 0.051 | ALVSSVR          | 2    |
| 18 |                                                      |             |   | 0.051 | LVQEV TDFAK      | 2    |
| 18 |                                                      |             |   | 0.051 | APQVSTPTLVEAAR   | 2    |
| 18 | Cathepsin D                                          | gi 6753556  | 2 | 0.049 | QPGIVFVAAK       | 2    |
| 18 |                                                      |             |   | 0.049 | VSSLPTVYLK       | 2    |
| 20 | Myosin light chain 2                                 | gi 1709058  | 7 | 0.398 | VFDPEGK          | 2    |
| 20 |                                                      |             |   | 0.398 | DTFAALGR         | 2    |
| 20 |                                                      |             |   | 0.398 | NLVHIITHGEEKD    | 3    |
| 20 |                                                      |             |   | 0.398 | EmLTTQAER        | 2    |
| 20 |                                                      |             |   | 0.398 | NEEIDEmIK        | 2    |
| 20 |                                                      |             |   | 0.398 | DGFIDKNDLR       | 2    |
| 20 |                                                      |             |   | 0.398 | EAFImDQNR        | 2    |
| 20 | Transgelin 2                                         | gi 30519911 | 7 | 0.271 | DGTVLcK          | 2    |
| 20 |                                                      |             |   | 0.271 | IQASSmAFK        | 2    |
| 20 |                                                      |             |   | 0.271 | LINSLYPEGQAPVK   | 2, 3 |
| 20 |                                                      |             |   | 0.271 | LINSLYPEGQAPVKK  | 2, 3 |
| 20 |                                                      |             |   | 0.271 | KIQASSmAFK       | 2    |
| 20 |                                                      |             |   | 0.271 | TLmNLGGLAVAR     | 2    |
| 20 |                                                      |             |   | 0.271 | NFSDNQLQEGK      | 2    |
| 20 | Heat shock protein, alpha-crystallin-related, B6     | gi 59958370 | 4 | 0.216 | ASAPLPGFSAPGR    | 2, 3 |
| 20 |                                                      |             |   | 0.216 | VVDDHVEVHAR      | 3    |
| 20 |                                                      |             |   | 0.216 | RASAPLPGFSAPGR   | 3    |
| 20 |                                                      |             |   | 0.216 | HFLPEEISVK       | 2    |
| 20 | Adp-Ribosylation Factor 1                            | gi 1065361  | 3 | 0.200 | ILMVGLDAAGK      | 2    |
| 20 |                                                      |             |   | 0.200 | ILmVGLDAAGK      | 2    |
| 20 |                                                      |             |   | 0.200 | DAVLLVFANK       | 2    |
| 20 |                                                      |             |   | 0.200 | QDLPNA mNAAEITDK | 2    |
| 20 | Hypothetical protein LOC67939                        | gi 21312706 | 3 | 0.172 | QLGVGSGNLR       | 2    |
| 20 |                                                      |             |   | 0.172 | QINLNDLGK        | 2    |
| 20 |                                                      |             |   | 0.172 | FADETA mLEK      | 2    |
| 20 | Ubiquinone biosynthesis protein coq7                 | gi 3806019  | 2 | 0.112 | FNELmIAFR        | 2    |
| 20 |                                                      |             |   | 0.112 | IYAGQmAVLGR      | 2    |
| 20 | PREDICTED: similar to Cofilin-1                      | gi 73946791 | 2 | 0.106 | AVLFC lSEDKK     | 3    |
| 20 |                                                      |             |   | 0.106 | YALYDATYETK      | 2    |
| 20 | Transgelin                                           | gi 6755714  | 2 | 0.104 | AAEDYGVK         | 2    |
| 20 |                                                      |             |   | 0.104 | TLmALGSLAVTK     | 2    |
| 20 | EF hand domain containing 2                          | gi 31981086 | 2 | 0.088 | VQAINVSSR        | 2    |
| 20 |                                                      |             |   | 0.088 | LSEIDVSTEGVK     | 2    |
| 20 | Peroxiredoxin-3                                      | gi 6680690  | 2 | 0.074 | ELSLDDFK         | 2    |
| 20 |                                                      |             |   | 0.074 | HLSVNDLPVGR      | 2    |
| 20 | Electron transferring flavoprotein, beta polypeptide | gi 38142460 | 2 | 0.067 | SGVVT DGVK       | 2    |
| 20 |                                                      |             |   | 0.067 | VDLLFLGK         | 2    |

Supplementary Table 1.xls

|    |                                                   |              |    |       |                    |      |
|----|---------------------------------------------------|--------------|----|-------|--------------------|------|
| 20 | PREDICTED: similar to Actin, cytoplasmic 2 (Gam   | gi 109489498 | 2  | 0.027 | DLTDYLmK           | 2    |
| 20 |                                                   |              |    | 0.027 | EITALAPSTmK        | 2    |
| 22 | Ubiquinol-cytochrome c reductase, Rieske iron-sul | gi 13385168  | 5  | 0.142 | VPDFSDYRR          | 2, 3 |
| 22 |                                                   |              |    | 0.142 | LSDIPEGK           | 2    |
| 22 |                                                   |              |    | 0.142 | AEVLDSTK           | 1, 2 |
| 22 |                                                   |              |    | 0.142 | RAEVLSTK           | 2    |
| 22 |                                                   |              |    | 0.142 | EIDQEAAVEVSQLR     | 2, 3 |
| 22 | Ig kappa chain                                    | gi 1083380   | 2  | 0.096 | TSTSPIVK           | 2    |
| 22 |                                                   |              |    | 0.096 | FSGSGSGTDFTLK      | 2    |
| 22 | Es1 protein                                       | gi 20070420  | 2  | 0.068 | NVLAESAR           | 2    |
| 22 |                                                   |              |    | 0.068 | NLSTFAVDGK         | 2    |
| 23 | Hypoxia up-regulated 1                            | gi 31542333  | 19 | 0.186 | VLFSR              | 2    |
| 23 |                                                   |              |    | 0.186 | GVGESFK            | 2    |
| 23 |                                                   |              |    | 0.186 | AVLQAAR            | 2    |
| 23 |                                                   |              |    | 0.186 | VITFNR             | 2    |
| 23 |                                                   |              |    | 0.186 | TPVTVTLK           | 2    |
| 23 |                                                   |              |    | 0.186 | LEELTLR            | 2    |
| 23 |                                                   |              |    | 0.186 | KTPVTVTLK          | 2    |
| 23 |                                                   |              |    | 0.186 | EVQYLLNK           | 2    |
| 23 |                                                   |              |    | 0.186 | LcQGLFFR           | 2    |
| 23 |                                                   |              |    | 0.186 | EVEEEPGLR          | 2    |
| 23 |                                                   |              |    | 0.186 | TLGGLEmELR         | 2    |
| 23 |                                                   |              |    | 0.186 | VAIVKPGVPmEIVLNK   | 3    |
| 23 |                                                   |              |    | 0.186 | SRFPEHELIVDPQR     | 3    |
| 23 |                                                   |              |    | 0.186 | FLGDSAAGmAIK       | 2    |
| 23 |                                                   |              |    | 0.186 | EAGmQPQLQIR        | 2    |
| 23 |                                                   |              |    | 0.186 | LPATEKPVLLSK       | 2    |
| 23 |                                                   |              |    | 0.186 | SLAEDFAEQPIK       | 2    |
| 23 |                                                   |              |    | 0.186 | AEPPLNASAGDQEEK    | 2    |
| 23 |                                                   |              |    | 0.186 | LGNTISSLFGGGTSSDAK | 2    |
| 23 | PREDICTED: similar to Actin, cytoplasmic 2 (Gam   | gi 109489498 | 7  | 0.102 | IIAPPERK           | 2    |
| 23 |                                                   |              |    | 0.102 | AGFAGDDAPR         | 2    |
| 23 |                                                   |              |    | 0.102 | QEYDESGPSIVHR      | 3    |
| 23 |                                                   |              |    | 0.102 | DLTDYLmK           | 2    |
| 23 |                                                   |              |    | 0.102 | GYSFTTTAER         | 2    |
| 23 |                                                   |              |    | 0.102 | EITALAPSTmK        | 2    |
| 23 |                                                   |              |    | 0.102 | DSYVGDEAQSK        | 2    |
| 23 | PREDICTED: similar to ATP synthase beta chain     | gi 73968432  | 5  | 0.102 | VLDSGAPIK          | 2    |
| 23 |                                                   |              |    | 0.102 | IGLFGGAGVGK        | 2    |
| 23 |                                                   |              |    | 0.102 | IPVGPETLGR         | 2    |
| 23 |                                                   |              |    | 0.102 | TIAmDGTEGLVR       | 2    |
| 23 |                                                   |              |    | 0.102 | ImNVIGEPIDER       | 2    |
| 23 | PREDICTED: similar to myosin heavy chain 6        | gi 109082950 | 36 | 0.094 | SLSTELFK           | 2    |
| 23 |                                                   |              |    | 0.094 | SNAAAAALDK         | 2    |

Supplementary Table 1.xls

|    |                            |             |   |       |                  |      |
|----|----------------------------|-------------|---|-------|------------------|------|
| 23 |                            |             |   | 0.094 | KVQHELDEAEER     | 3    |
| 23 |                            |             |   | 0.094 | LQDAEEAVEAVNAK   | 2, 3 |
| 23 |                            |             |   | 0.094 | YETDAIQR         | 2    |
| 23 |                            |             |   | 0.094 | SVNDLTSQR        | 2    |
| 23 |                            |             |   | 0.094 | KLAEQELIETSER    | 2, 3 |
| 23 |                            |             |   | 0.094 | SNAAAAALDKK      | 2    |
| 23 |                            |             |   | 0.094 | ANSEVAQWR        | 2    |
| 23 |                            |             |   | 0.094 | ADIAESQVNK       | 2    |
| 23 |                            |             |   | 0.094 | SLNDFTTQR        | 2    |
| 23 |                            |             |   | 0.094 | IKELTYQTEEDKK    | 3    |
| 23 |                            |             |   | 0.094 | AQLEFNQIK        | 2    |
| 23 |                            |             |   | 0.094 | QAEAEQANTNLSK    | 2, 3 |
| 23 |                            |             |   | 0.094 | qAEAEQANTNLSK    | 2    |
| 23 |                            |             |   | 0.094 | KAITDAAmAEELKK   | 3    |
| 23 |                            |             |   | 0.094 | LDEAEQIALK       | 2    |
| 23 |                            |             |   | 0.094 | LQTENGELAR       | 2    |
| 23 |                            |             |   | 0.094 | QKYEESQSELESSQK  | 3    |
| 23 |                            |             |   | 0.094 | TKYETDAIQR       | 2    |
| 23 |                            |             |   | 0.094 | TLEDQANEYR       | 2    |
| 23 |                            |             |   | 0.094 | LEQQVDDLEGSLEQEK | 3    |
| 23 |                            |             |   | 0.094 | DIDDLETLAK       | 2    |
| 23 |                            |             |   | 0.094 | DTQIQLDDAVR      | 2    |
| 23 |                            |             |   | 0.094 | LQDLVDKLQLK      | 2    |
| 23 |                            |             |   | 0.094 | ELENELEAEQK      | 2    |
| 23 |                            |             |   | 0.094 | VQHELDEAEER      | 2    |
| 23 |                            |             |   | 0.094 | ELTYQTEEDKK      | 2    |
| 23 |                            |             |   | 0.094 | LAEQELIETSER     | 2    |
| 23 |                            |             |   | 0.094 | IEDEQALGSQLQK    | 2    |
| 23 |                            |             |   | 0.094 | ELENELEAEQKR     | 2    |
| 23 |                            |             |   | 0.094 | IEEEEELEAER      | 2    |
| 23 |                            |             |   | 0.094 | YEESQSELESSQK    | 2    |
| 23 |                            |             |   | 0.094 | LEDEEEemNAELTAK  | 2    |
| 23 |                            |             |   | 0.094 | NLTEEmAGLDEIIAK  | 2    |
| 23 |                            |             |   | 0.094 | LEEAGGATSVQIEmNK | 2    |
| 23 |                            |             |   | 0.094 | qKYEESQSELESSQK  | 2    |
| 23 | Desmin                     | gi 33563250 | 4 | 0.083 | FANYIEK          | 2    |
| 23 |                            |             |   | 0.083 | ADVDAATLAR       | 2    |
| 23 |                            |             |   | 0.083 | TSGGAGGLGSLR     | 2    |
| 23 |                            |             |   | 0.083 | VSDLTQAANK       | 2    |
| 23 | Heat shock protein 1, beta | gi 40556608 | 5 | 0.077 | YIDQEELNK        | 2    |
| 23 |                            |             |   | 0.077 | SIYYITGESK       | 2    |
| 23 |                            |             |   | 0.077 | ADLINNLGTIAK     | 2    |
| 23 |                            |             |   | 0.077 | EQVANSFVER       | 2    |
| 23 |                            |             |   | 0.077 | GVVDSIDLPLNISR   | 2    |

Supplementary Table 1.xls

|    |                                                |              |   |       |                  |      |
|----|------------------------------------------------|--------------|---|-------|------------------|------|
| 23 | Procollagen, type VI, alpha 1                  | gi 6753484   | 6 | 0.064 | IALVITDGR        | 2    |
| 23 |                                                |              |   | 0.064 | GVLYQTVSR        | 2    |
| 23 |                                                |              |   | 0.064 | VPNYQALLR        | 2    |
| 23 |                                                |              |   | 0.064 | VAVVQYSGQGQQQPGR | 2, 3 |
| 23 |                                                |              |   | 0.064 | GDEGPPGPEGLR     | 2    |
| 23 |                                                |              |   | 0.064 | TAEYDVAFGER      | 2    |
| 23 | Vimentin                                       | gi 2078001   | 3 | 0.058 | SSVPGVR          | 2    |
| 23 |                                                |              |   | 0.058 | QVDQLTNDK        | 2    |
| 23 |                                                |              |   | 0.058 | FADLSEAANR       | 2    |
| 23 | NADH dehydrogenase (ubiquinone) Fe-S protein 1 | gi 21704020  | 4 | 0.052 | ILQDIASGR        | 2    |
| 23 |                                                |              |   | 0.052 | FEAPLFNAR        | 2    |
| 23 |                                                |              |   | 0.052 | SATYVNTEGR       | 2    |
| 23 |                                                |              |   | 0.052 | LEEVSPNLVR       | 2    |
| 23 | ATP synthase alpha subunit precursor           | gi 114511    | 2 | 0.047 | APGIIPR          | 2    |
| 23 |                                                |              |   | 0.047 | VLSIGDGIAR       | 2    |
| 23 | Valosin containing protein                     | gi 30023842  | 3 | 0.037 | GDDLSTAILK       | 2    |
| 23 |                                                |              |   | 0.037 | mDELQLFR         | 2    |
| 23 |                                                |              |   | 0.037 | EVDIGIPDATGR     | 2    |
| 23 | Albumin 1                                      | gi 33859506  | 2 | 0.036 | TNcDLYEK         | 2    |
| 23 |                                                |              |   | 0.036 | APQVSTPTLVEAAR   | 2    |
| 23 | Fibronectin 1                                  | gi 46849812  | 6 | 0.028 | APITGYIIR        | 2    |
| 23 |                                                |              |   | 0.028 | GDSPASSKPVSINYK  | 3    |
| 23 |                                                |              |   | 0.028 | STTPDITGYR       | 2    |
| 23 |                                                |              |   | 0.028 | FTNIGPDTmR       | 2    |
| 23 |                                                |              |   | 0.028 | ATGVFTTLQPLR     | 2    |
| 23 |                                                |              |   | 0.028 | ESNPLTAQQTTK     | 2    |
| 23 | Spectrin alpha 2                               | gi 115496850 | 4 | 0.019 | DLASVQALLR       | 2    |
| 23 |                                                |              |   | 0.019 | ITALDEFATK       | 2    |
| 23 |                                                |              |   | 0.019 | TATDEAYKDPSNLQGK | 3    |
| 23 |                                                |              |   | 0.019 | VLETAEDIQER      | 2    |
| 23 | Hypothetical protein gbs1143                   | gi 25011194  | 2 | 0.017 | VAITLK           | 2    |
| 23 |                                                |              |   | 0.017 | SVEAYNAGVR       | 2    |

Supplementary Table 1.xls
